# Supplementary material for: MicroRNA profiling in human diploid fibroblasts uncovers miR-519 role in replicative senescence
Source: publisher site journal article supplement (doi:10.18632/aging.100159), 2010-06-19
Supplement: Supplementary file [file aging-v2i6-100159-supplementary-material-ST2.pdf]

| miR name    | miRBase Acc No. | Primer Sequence           | miR name    | miRBase Acc No. | Primer Sequence            |
|-------------|-----------------|---------------------------|-------------|-----------------|----------------------------|
| miR-96      | MIMAT0000095    | TTTGGCATTAGCACATTTTGGT    | miR-206     | MIMAT0000462    | TGGAATGTAAGGAAGTGTTGG      |
| miR-944     | MIMAT0004987    | AAATTAATTGCATCCGGATGAG    | miR-203     | MIMAT00000264   | GTGAAATGTTAGGACCTAG        |
| miR-9       | MIMAT0000441    | UCUUJGAGUUUUCUAGCUGUUAUGA | miR-194     | MIMAT0000460    | TGTAACAGACTCCATCTGTGGA     |
| miR-890     | MIMAT0004912    | TACTTGGAAAGGCATCAGTTG     | miR-18b     | MIMAT0001412    | TAAGGTGCATCTAGTGCAGTTAG    |
| miR-888     | MIMAT0004916    | TACTCAAAAAGCTGTCACTGA     | miR-18a     | MIMAT0000072    | TAAGGTGCATCTAGTGCAGATAG    |
| miR-876-5p  | MIMAT0004924    | TGGAATTCCTTTGTGAATCACCA   | miR-1826    | MIMAT0000676    | ATTGATCATCGACACTTCGACGCAAT |
| miR-874     | MIMAT0004911    | CTGCCCTGGCCCGAGGGACCGA    | miR-15a     | MIMAT0000068    | TAGCAGCACATAATGTTTGTG      |
| miR-760     | MIMAT0004957    | CGGCTCTGGGTCTGTGGGA       | miR-155     | MIMAT0000646    | TTAATGCTAATCGTGATAGGGGT    |
| miR-758     | MIMAT0003879    | UUUGUAGCUCUGUCCCAUACC     | miR-1537    | MIMAT0007399    | AAAACCGTCTAGTTACAGTTGT     |
| miR-7       | MIMAT0000252    | TGAAGACTAGTGATTTTGTGT     | miR-146b-3p | MIMAT0004766    | TGCCCTGGACTCAGTTCTGG       |
| miR-664     | MIMAT0005949    | UUUUAUUUUUACCCAGCCUACA    | miR-141     | MIMAT0000432    | TAACACTGTCTGGTAAAGATGG     |
| miR-663     | MIMAT0003326    | AGCGGGGGCGCCGGGACCCG      | miR-140-5p  | MIMAT0000431    | CAGTGGTTTTACCTATGGTAG      |
| miR-658     | MIMAT0003336    | GGCGGAGGGAGTACTGCTTGGT    | miR-140-3p  | MIMAT0004597    | TACCACAGGTTGAAACCACGG      |
| miR-653     | MIMAT0003328    | TGTTTGAACAATCTACTCTG      | miR-135b    | MIMAT0000758    | TATGGCTTTTCATTCTATGTGA     |
| miR-651     | MIMAT0003321    | TTTAGGATAAGCTTGACTTTTG    | miR-135a    | MIMAT0000428    | TATGGCTTTTATCTCTATGTGA     |
| miR-649     | MIMAT0003319    | AAACCTGTGTTGTTCAAGAGTC    | miR-133b    | MIMAT0000770    | TTTGGTCCCTTCAACCAGCTA      |
| miR-641     | MIMAT0003311    | AAAGCATAGGATAGTACCTCCTC   | miR-1323    | MIMAT0005795    | TCAAACCTAGGGGACTTTTCT      |
| miR-640     | MIMAT0003310    | ATGATCCAGGAACCTGCCTCT     | miR-132     | MIMAT0000426    | TAACAGTCTACAGCCATGGTCG     |
| miR-633     | MIMAT0003303    | CTAATAGTATCTACCACAATAAA   | miR-1305    | MIMAT0005893    | TTTCAACTCTAATGGGAGAGA      |
| miR-628-5p  | MIMAT0004809    | ATGCTGACATTTACTAGAGG      | miR-1304    | MIMAT0005892    | TTTGGGCTACAGTGAGATGTG      |
| miR-626     | MIMAT0003295    | AGCGUCUGAAAUGUCUU         | miR-1303    | MIMAT0005891    | TTTAGAGACGGGTCTTGCTCT      |
| miR-625     | MIMAT0003294    | AGGGGAAAGTTCTATAGTCC      | miR-1296    | MIMAT0005794    | TTAGGGCCCTGGCTCCATCTCC     |
| miR-622     | MIMAT0003291    | ACAGTCTGCTGAGGTTGGAGC     | miR-129-5p  | MIMAT0000242    | CTTTTGGCGTCTGGGCTTGC       |
| miR-618     | MIMAT0003287    | AACTCTACTTGTCTCTGAGT      | miR-129-3p  | MIMAT0004605    | AAGCCCTACCCAAAAAGCAT       |
| miR-616     | MIMAT0004805    | AGTCATTGGAGGTTTGGAGCAG    | miR-1291    | MIMAT0005881    | TGGCCCTGACTGGAAGACCAGCT    |
| miR-613     | MIMAT0003281    | AGGAATGTTCTTCTTTGCC       | miR-1289    | MIMAT0005879    | TGGAGTCCAGGAATCTGCATTTT    |
| miR-607     | MIMAT0003275    | GTTCAAATCCAGATCTATAAC     | miR-1288    | MIMAT0005942    | TGGAATCCCTGATCTGGAGA       |
| miR-605     | MIMAT0003273    | TAATCCCATGGTCTGCTTCTCT    | miR-1287    | MIMAT0005878    | TCTGGATGACTGTTGTCGATC      |
| miR-600     | MIMAT0003268    | ACTTACAGACAAGGCCTTGCTC    | miR-1286    | MIMAT0005877    | TGCAGGACCAAGATGAGCCCT      |
| miR-587     | MIMAT0003253    | UUUCAUAGUGUAGUAGUCAC      | miR-1285    | MIMAT0005876    | TCTGGGCAACAAGTGAGACCT      |
| miR-584     | MIMAT0003249    | TTATGTTTGCCTGGGACTGAG     | miR-1284    | MIMAT0005941    | TCTATAACAGACTGGCTTTTC      |
| miR-577     | MIMAT0003242    | TAGATAAAATTTGATACCTG      | miR-1283    | MIMAT0005799    | TCTACAAGGAAACCGCTTCT       |
| miR-576-3p  | MIMAT0004796    | AAGATGTGAAAATTGGAAATC     | miR-1282    | MIMAT0005940    | TCGTTTGCCTTTTCTGCTT        |
| miR-572     | MIMAT0003237    | GTCGCTCGGGCGGTGGCCCA      | miR-1281    | MIMAT0005939    | UCGCCUCCUCCUCCUCC          |
| miR-569     | MIMAT0003234    | AGTTAATGAATCTGGAAAGT      | miR-1280    | MIMAT0005946    | TCCCACCGCTGCCUCC           |
| miR-562     | MIMAT0003226    | AAAGTAGCTTACCAATTTGC      | miR-128     | MIMAT0000424    | TACAGGTAAACCCGGTCTCTT      |
| miR-561     | MIMAT0003225    | CAAAGTTAAGATCCTTGAAGT     | miR-1279    | MIMAT0005937    | TCATATTGCTTCTTCT           |
| miR-553     | MIMAT0003216    | AAAACGCTGAGATTTGTTTT      | miR-1278    | MIMAT0005936    | TAGTACTGTGCATCATCATCTAT    |
| miR-551a    | MIMAT0003214    | CGACCCACTCTTGTTTCCCA      | miR-1276    | MIMAT0005930    | TAAGAGGCCCTGTGGAGACA       |
| miR-550     | MIMAT0004800    | AGTGCCTGAGGGAGTAAGAGCCC   | miR-127-5p  | MIMAT0004604    | CTGAAGCTCAGAGGGCTCTGAT     |
| miR-548p    | MIMAT0005934    | TAGCAAAAACCTGCAGTACTTT    | miR-1275    | MIMAT0005929    | GUGGGGAGAGGUCUGUC          |
| miR-548i    | MIMAT0005935    | AAAAGTAATTCGGGATTTGGCC    | miR-1274a   | MIMAT0005927    | GTCCCTGTTCAGGCCCA          |
| miR-548k    | MIMAT0005882    | AAAAGTACTTCCGATTTTGGCT    | miR-127-3p  | MIMAT0000446    | TCGGAATCCGCTGAGCTTGGCT     |
| miR-548j    | MIMAT0005875    | AAAAGTAATTCGGGCTTTGGT     | miR-1273    | MIMAT0005926    | GGGCGACAAGCAAGACTCTTTCT    |
| miR-548i    | MIMAT0005935    | AAAAGUAAUUCGGGAUUUUGCC    | miR-1272    | MIMAT0005925    | GATGATGATGGCAGCAATCTGAAA   |
| miR-548h    | MIMAT0005928    | AAAAGUAAUUCGGGUUUUUGUC    | miR-1271    | MIMAT0005796    | CTTGGCACCTGACGACCTCA       |
| miR-548e    | MIMAT0005874    | AAAACCTGAGACTCTTTTGCA     | miR-1270    | MIMAT0005924    | CTGGAGATGGAAGAGCTGTGT      |
| miR-548d-5p | MIMAT0005799    | TCTACAAGGAAAGCGCTTTCT     | miR-1269    | MIMAT0005923    | CTGACTGAGCGGTCTACTGG       |
| miR-548d-3p | MIMAT0003323    | CAAAACCCACAGTTTCTTTTGC    | miR-1268    | MIMAT0005922    | CGGGGUGUGUGUGGGGG          |
| miR-548c-5p | MIMAT0004806    | AAAAGTAATTCGGGATTTGGCC    | miR-1267    | MIMAT0005921    | CTGTGTGAAGTGAATCCCCA       |
| miR-548c-3p | MIMAT0003285    | CAAAAUCUCUAAUUAUUUUGC     | miR-1266    | MIMAT0005920    | CCTCAGGCGTGTAGAACAGGGCT    |
| miR-548b-3p | MIMAT0003254    | CAAGAACCTCAGTTGCTTTTGT    | miR-1265    | MIMAT0005918    | CAGGATGTGGTCAAGTGTGTT      |
| miR-548a-5p | MIMAT0004803    | AAAAGUAAUUCGGAGUUUUAACC   | miR-1264    | MIMAT0005917    | CAAGTCTATTTGAGCACCTGT      |
| miR-548a-3p | MIMAT0003251    | CAAAACCTGCAATTTACTTTTGC   | miR-1263    | MIMAT0005915    | ATGGTACCGGCTACCTAGT        |
| miR-545     | MIMAT0003165    | TCAGCAAACATTTATTGTGTGC    | miR-1262    | MIMAT0005914    | ATGGGTGAATTTGTAAGAGAT      |
| miR-544     | MIMAT0003164    | ATTCTGCCTTTAGCAAGTTC      | miR-1261    | MIMAT0005913    | ATGGATAAGGCTTTGGCTT        |
| miR-543     | MIMAT0004954    | AAACATTCGCTTGCATCTCTT     | miR-1260    | MIMAT0005911    | ATCCCACCTGCCCACCA          |
| miR-522     | MIMAT0002868    | AAAATGGTCCCTTTAGAGTGT     | miR-125b    | MIMAT0000423    | TCCCTGAGACCCTAACTTGTGA     |
| miR-520e    | MIMAT0002825    | AAAGTGCCTCTTTTGGAGGG      | miR-125a-5p | MIMAT0000443    | TCCCTGAGACCCTTAACTGTGA     |
| miR-520d-3p | MIMAT0002856    | AAAGUGUCUUCUUCUUGGUGGU    | miR-125a-3p | MIMAT0004602    | ACAGGTGAGGTTCTTGGAGCC      |
| miR-520c-3p | MIMAT0002846    | AAAGTGCCTCTTTAGAGGTT      | miR-1259    | MIMAT0005910    | ATATATGATGACTTACTTTT       |
| miR-520b    | MIMAT0002843    | AAAGTGCCTCTTTAGAGGG       | miR-1258    | MIMAT0005909    | AGTTAGGATTAGGTCGTGGAA      |
| miR-520a-3p | MIMAT0002834    | AAAGTGCCTCTTTGGACTGT      | miR-1257    | MIMAT0005908    | AGTGAATGATGGGTTCTGACC      |
| miR-519e    | MIMAT0002829    | AAGTGCCTCTTTAGAGGTT       | miR-1256    | MIMAT0005907    | AGGCAATTGACTTCACTAGCT      |
| miR-519c-3p | MIMAT0002832    | AAAGTGATCTTTTAGAGGAT      | miR-1255b   | MIMAT0005945    | CGGATGACCAAAAGAGTGTT       |
| miR-519b-3p | MIMAT0002837    | AAAGTGATCTCTTTAGAGGTT     | miR-1255a   | MIMAT0005906    | AGGAUGAGCAAAGAAUAGAUU      |
| miR-519a    | MIMAT0002869    | AAAGTGATCTCTTTAGAGTGT     | miR-1254    | MIMAT0005905    | AGCCTGGAAGCTGAGCCCTGCAGT   |
| miR-518e    | MIMAT0002861    | AAAGCGCTCTCCCTTCAGAGT     | miR-1253    | MIMAT0005904    | AGAGAAGAAGATCGACCTGCA      |
| miR-518d-3p | MIMAT0002864    | CAAAGCGCTCTCCCTTGGAGC     | miR-1250    | MIMAT0005902    | ACCGTGCTGATGTTGGCCTTT      |
| miR-518c    | MIMAT0002848    | CAAAGCGCTCTCTTTAGAGTGT    | miR-1249    | MIMAT0005901    | ACGCCUCCUCCUCCUUCUUA       |
| miR-518b    | MIMAT0002844    | CAAAGCGCTCTCCCTTGAAGT     | miR-1248    | MIMAT0005900    | ACCTTCTGTATGACACTGTGCTAAA  |
| miR-518a-3p | MIMAT0002863    | GAAAGCGCTCTCCCTTGGTGG     | miR-1247    | MIMAT0005899    | ACCCGCTCCCTGCTCCCGGA       |
| miR-517b    | MIMAT0002857    | TCGTGCATCTCTTTAGAGTGT     | miR-1246    | MIMAT0005898    | AATGGATTTTGGAGCAGG         |
| miR-516b    | MIMAT0002859    | ATCTGGAGGTAAAGACACTTT     | miR-1245    | MIMAT0005897    | AAGTATCTAAAGGCCTACAT       |

Supplemental Table S2. Primers used for RT-qPCR detection of the microRNAs in Figures 2 and 3 and in supplemental Figure S1.
